# Supplementary material for: Bivalent inhibitors of the tyrosine kinases ABL and SRC: determinants of potency and selectivity
Source: Royal Society of Chemistry journal article supplement (doi:10.1039/c0mb00108b), 2010-11-09
Supplement: c0mb00108b.pdf [file c0mb00108b.pdf]

*Supplementary Information*

# Bivalent inhibitors of the tyrosine kinases ABL and SRC: Determinants of potency and selectivity

Zachary B. Hill, B. Gayani K. Perera and Dustin J. Maly\*

*Department of Chemistry, University of Washington, Box 351700, Seattle, Washington 98195-1700, USA*

## **Contents**

- I. Primers Used for Overlap Extension PCR of AGT Constructs**
- II. Primers Used for Cloning of SRC and HCK SH3 Domain**
- III. Analytical HPLC Traces of Compounds 3,4,5, and 7**
- IV. SDS-PAGE Gel of AGT Constructs**
- V. Fluorescence Polarization Assay Data and Analysis**

## I. Primers Used for Overlap Extension PCR of AGT Constructs

### AGT(PP1)

#### Step 1

FWD: 5'- CCG CGT AAC CGT CCG CGT CTG AGC GGT AGC GGC GAC AAA

GAT TGC GAA ATG AAA -3'

RVS: 5'- GGG GAC CAC TTT GTA CAA GAA AGC TGG GTA CTA CAG ACC

CGG TTT ACC-3'

#### Step 2

FWD: 5'- GGGG ACA AGT TTG TAC AAA AAA GCA GGC TTC GCG CCG CCG

CTG CCG CCG CGT AAC CGT CCG CGT CTG-3'

RVS: 5'- GGG GAC CAC TTT GTA CAA GAA AGC TGG GTA CTA CAG ACC

CGG TTT ACC-3'

### AGT(PP2)

#### Step 1

FWD: 5'- CCG CGT AAC CGT CCG CGT CTG AGC GGT AGC GGC AGC GGT

AGC GGC AGC GGT GAC AAA GAT TGC GAA ATG AAA -3'

RVS: 5'- GGG GAC CAC TTT GTA CAA GAA AGC TGG GTA CTA CAG ACC

CGG TTT ACC-3'

#### Step 2

FWD: 5'- GGGG ACA AGT TTG TAC AAA AAA GCA GGC TTC GTG TCT CTG

GCG CGT CGT CCG CTG CCG CCG CTG CCG CGT CTG AGC GGT AGC GGC-3'

RVS: 5'- GGG GAC CAC TTT GTA CAA GAA AGC TGG GTA CTA CAG ACC

CGG TTT ACC-3'

### AGT(PP3)

#### Step 1

FWD: 5'- CCG CTG CCG CCG CTG CCG CCG AGC GGT AGC GGC GAC AAA

GAT TGC GAA ATG AAA -3'

RVS: 5'- GGG GAC CAC TTT GTA CAA GAA AGC TGG GTA CTA CAG ACC

CGG TTT ACC-3'

#### Step 2

FWD: 5'- GGGG ACA AGT TTG TAC AAA AAA GCA GGC TTC CGT GCG GCG

CGT CCG CTG CCG CCG CTG CCG CCG-3'

RVS: 5'- GGG GAC CAC TTT GTA CAA GAA AGC TGG GTA CTA CAG ACC

CGG TTT ACC-3'

## **AGT(PP4)**

### Step 1

FWD: 5'- TAT AGC CCG CCG CCG CCG CCG AGC GGT AGC GGC GAC AAA

GAT TGC GAA ATG AAA-3'

RVS: 5'- GGG GAC CAC TTT GTA CAA GAA AGC TGG GTA CTA CAG ACC

CGG TTT ACC-3'

### Step 2

FWD: 5'- GGG GAC AAG TTT GTA CAA AAA AGC AGG CTT CGC GCC GAC

CTA TAG CCC GCC GCC GCC GCC G-3'

RVS: 5'- GGG GAC CAC TTT GTA CAA GAA AGC TGG GTA CTA CAG ACC

CGG TTT ACC-3'

## **II. Primers Used for Cloning of SRC and HCK SH3 Domain**

### **SRC SH3**

FWD: 5'- GGGG ACA AGT TTG TAC AAA AAA GCA GGC TTC GTC ACC ACT  
TTC GTG GCT CTC

RVS: 5'- GGG GAC CAC TTT GTA CAA GAA AGC TGG GTC CTA GGG CGC  
GAC ATA GTT ACT GGG

### **HCK SH3**

FWD: 5'- GGGG ACA AGT TTG TAC AAA AAA GCA GGC TTC ATC ATC GTG  
GTT GCC CTG TAT

RVS: 5'- GGG GAC CAC TTT GTA CAA GAA AGC TGG GTC CTA AAC GCG  
GGC GAC ATA GTT GCT

## **III. Analytical HPLC Traces of Compounds 1,2,3,4,5, and 6**

**General Analytical HPLC Conditions for compounds 1-3** C<sub>18</sub> column (250 x 4.6 mm),

Acetonitrile/Water-0.1% CF<sub>3</sub>CO<sub>2</sub>H gradient: 1:99 to 100:0 over 40 min.

Methanol/Water-0.1% CF<sub>3</sub>CO<sub>2</sub>H gradient: 1:99 to 100:0 over 40 min. Flow rate =  
1mL/min; 254 nM detection for 45 min

**General Analytical HPLC Conditions for compounds 4-6** C<sub>18</sub> column (150 x 2.1 mm),

Acetonitrile/Water-0.1% CF<sub>3</sub>CO<sub>2</sub>H gradient: 1:99 to 100:0 over 30 min.

Methanol/Water-0.1% CF<sub>3</sub>CO<sub>2</sub>H gradient: 1:99 to 100:0 over 30 min. Flow rate =  
1mL/min; 254 nM detection for 30 min.

### Analytical HPLC traces for compound 1

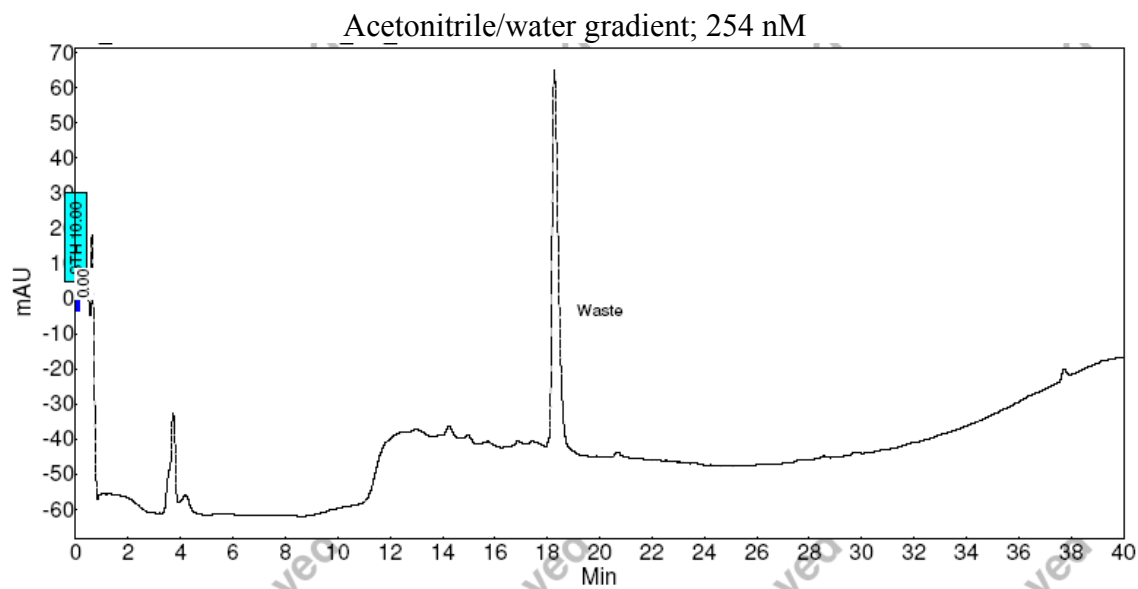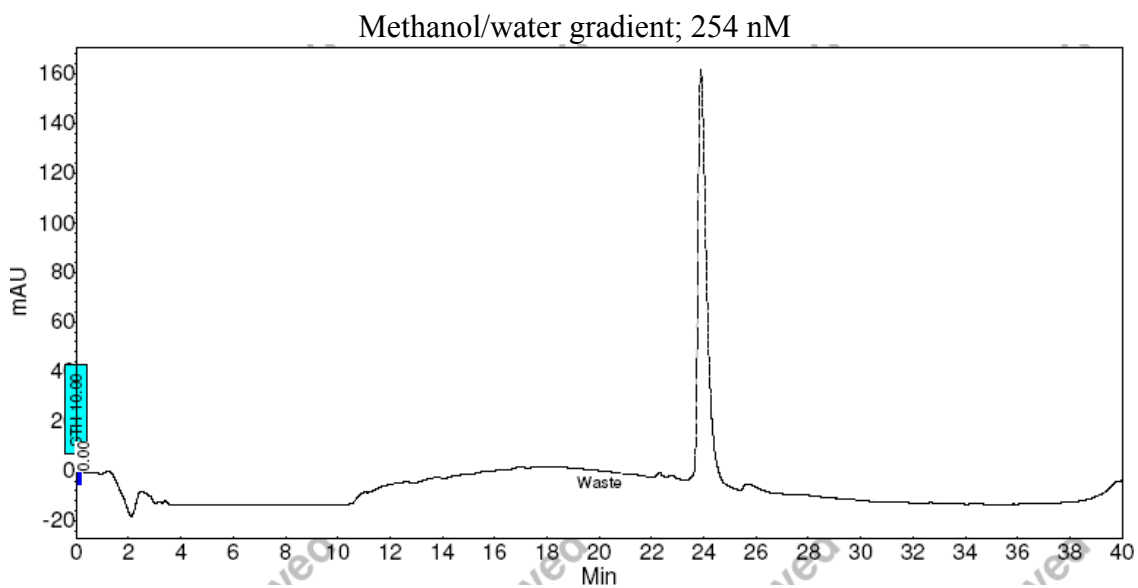

### Analytical HPLC traces for compound 2

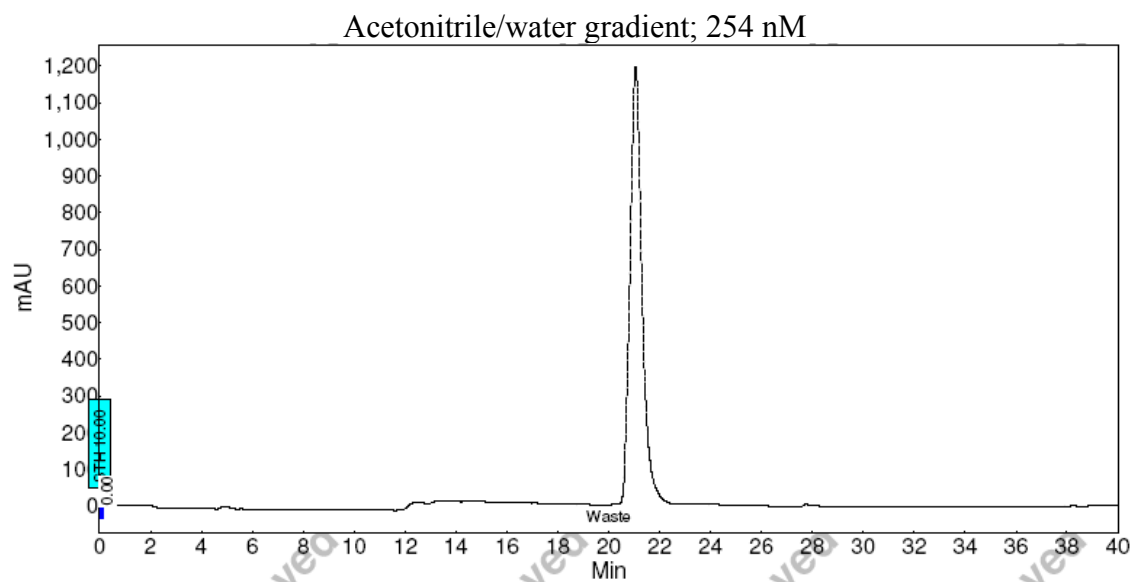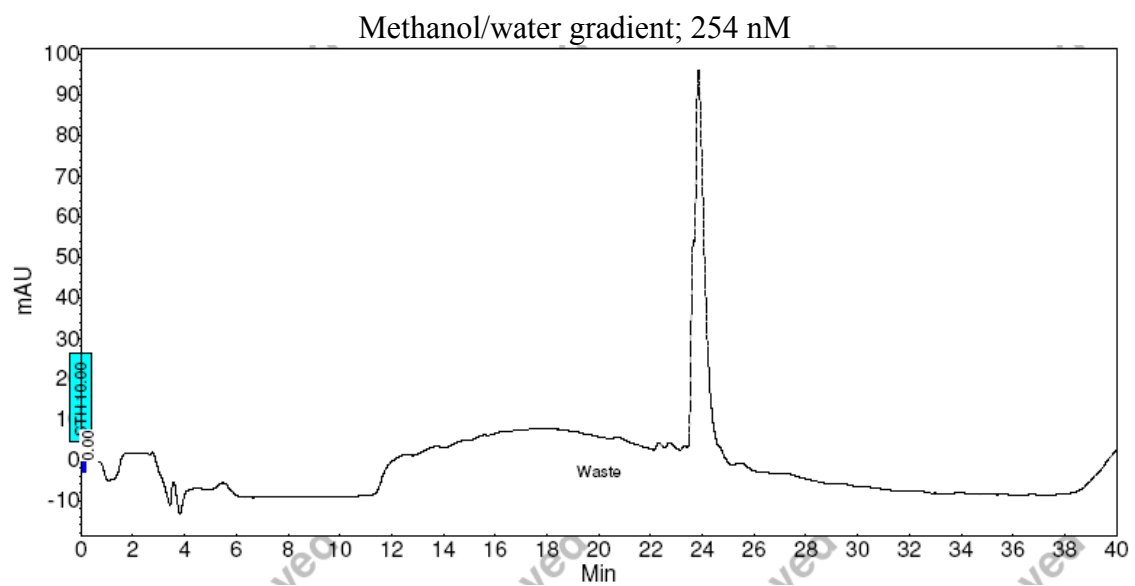

### Analytical HPLC trace for compound 3

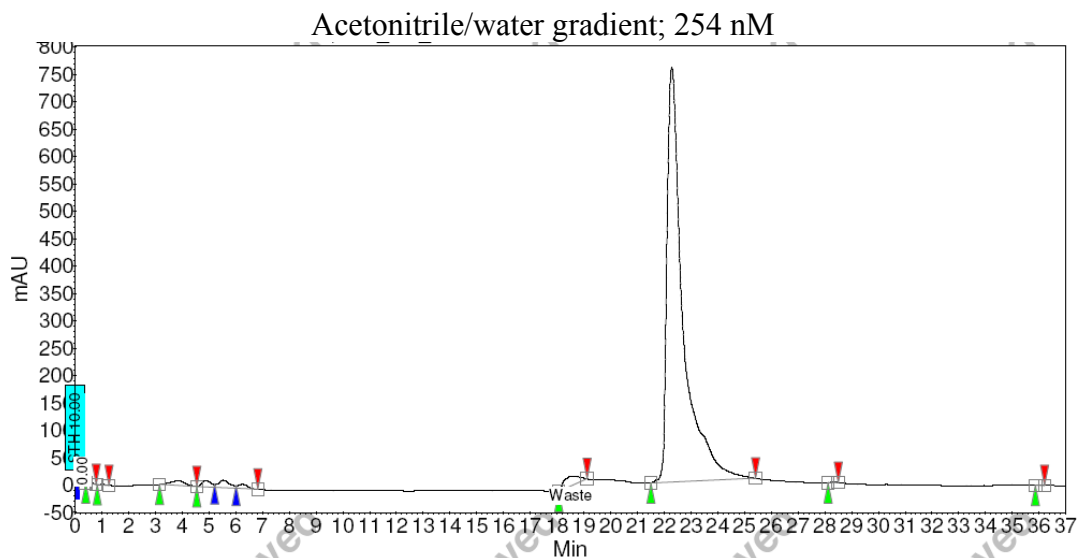

### Analytical HPLC traces for compound 4

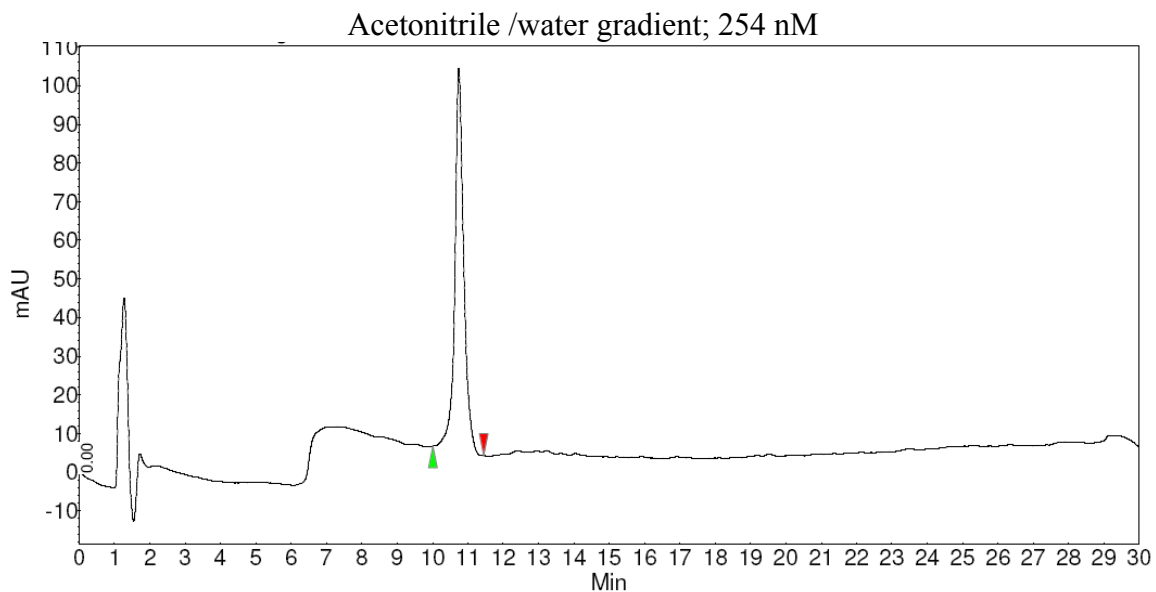

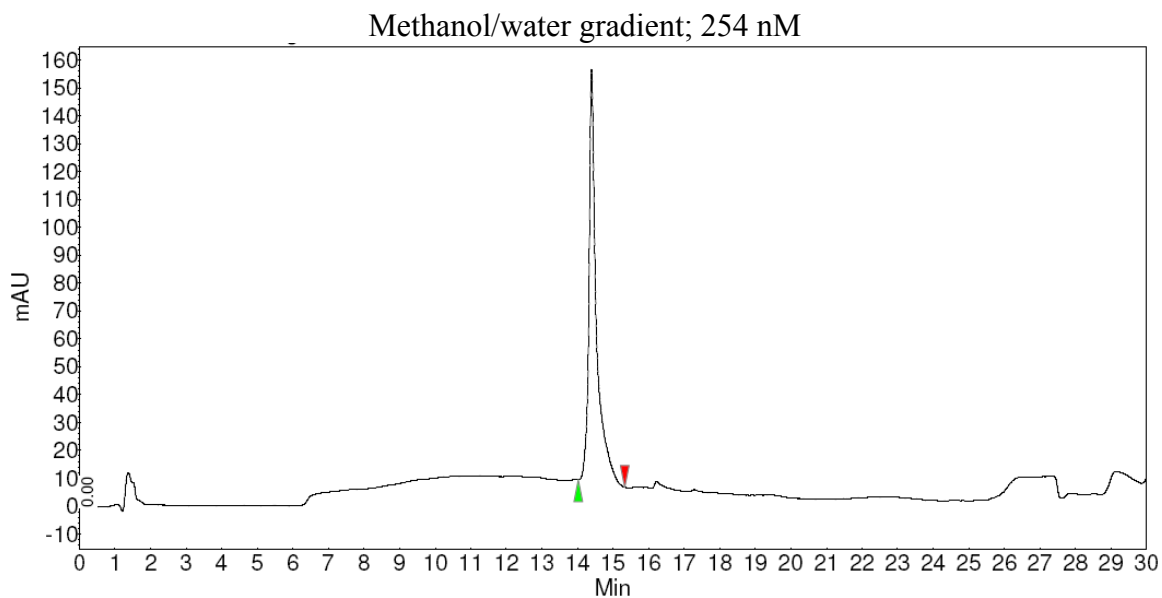

**Analytical HPLC traces for compound 5**

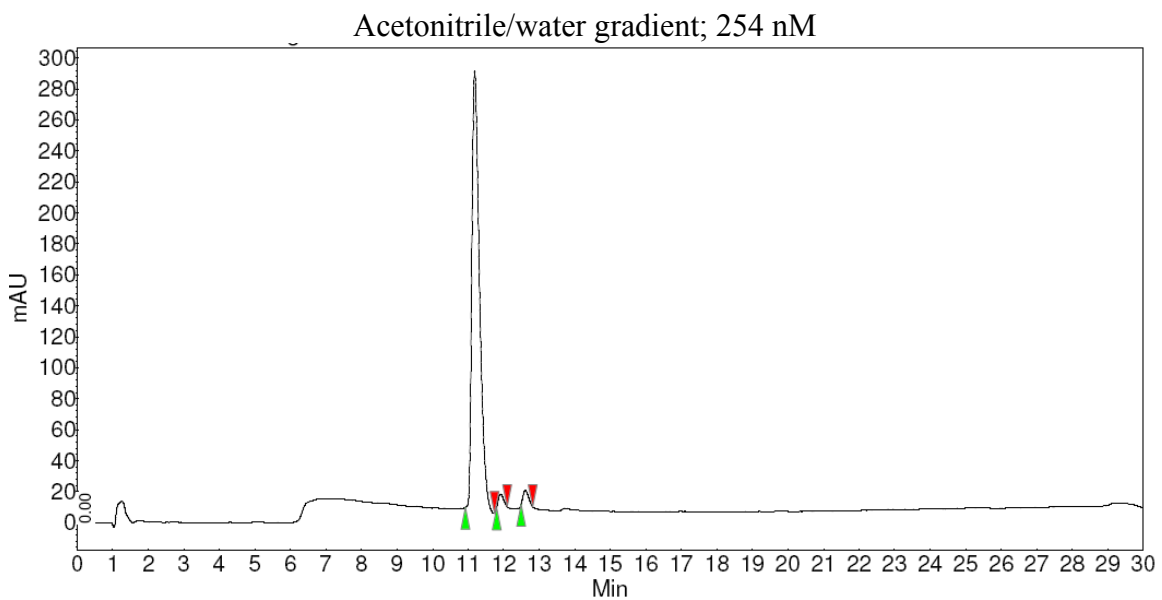

Methanol/water gradient; 254 nM

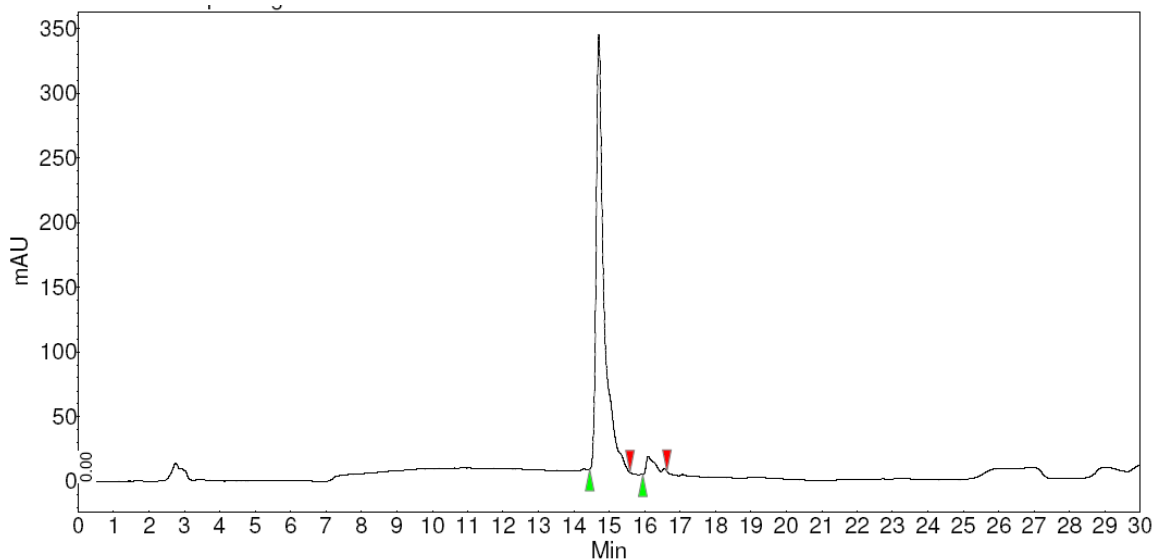

Analytical HPLC traces for compound 6

Acetonitrile/water gradient; 254 nM

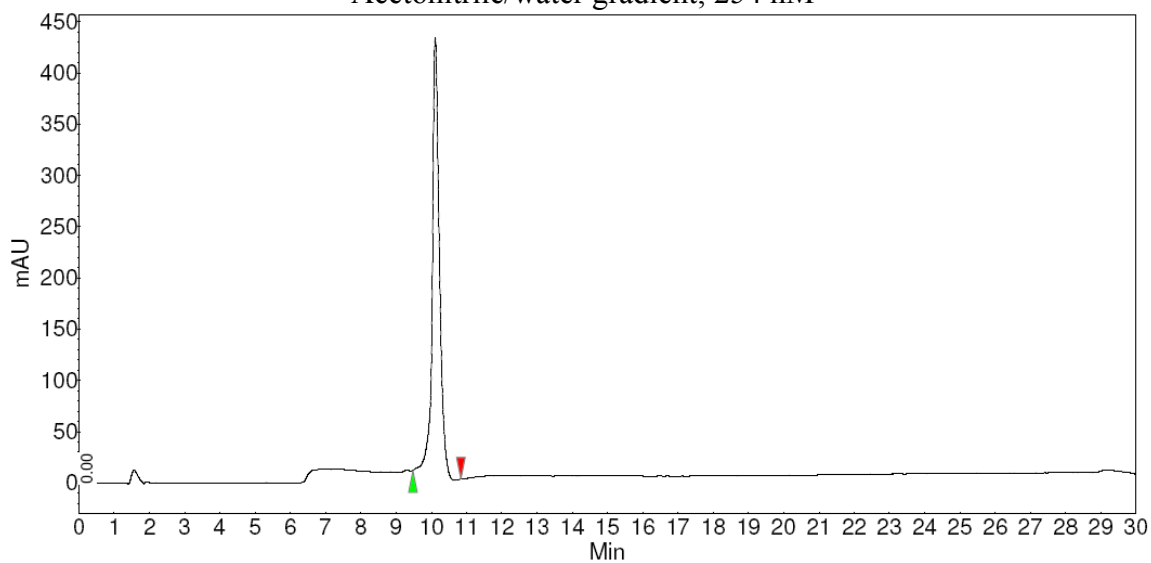



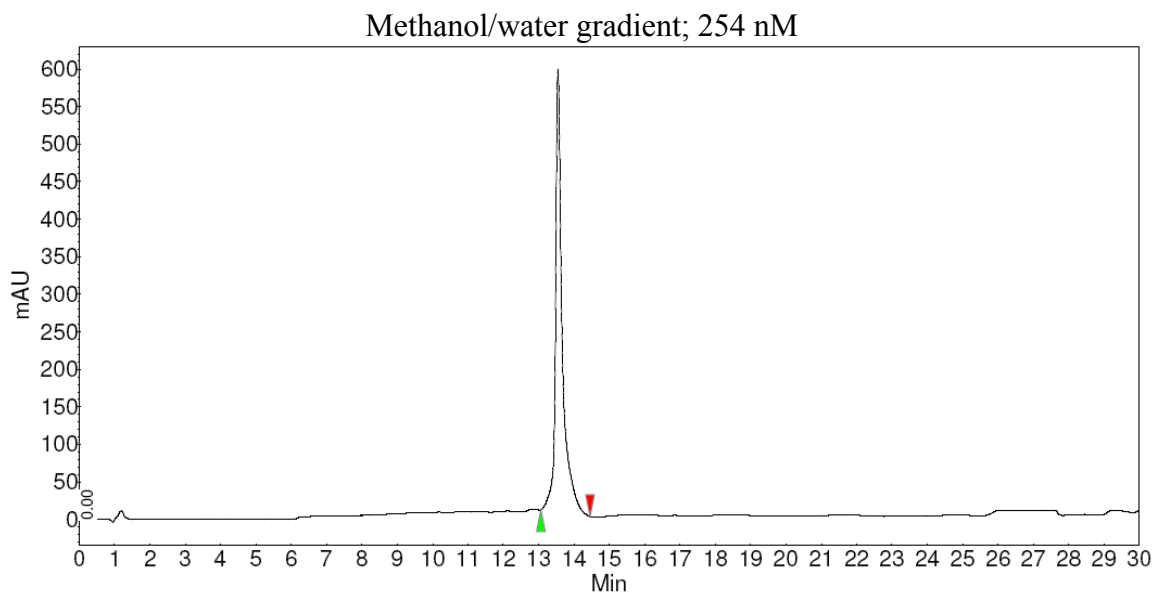

#### IV. SDS-PAGE Gel of AGT Constructs

To verify protein purity, AGT constructs were run on a 15% SDS-Page gel and stained with coomassie (gel below). 2.5  $\mu$ g of protein was loaded in each well.

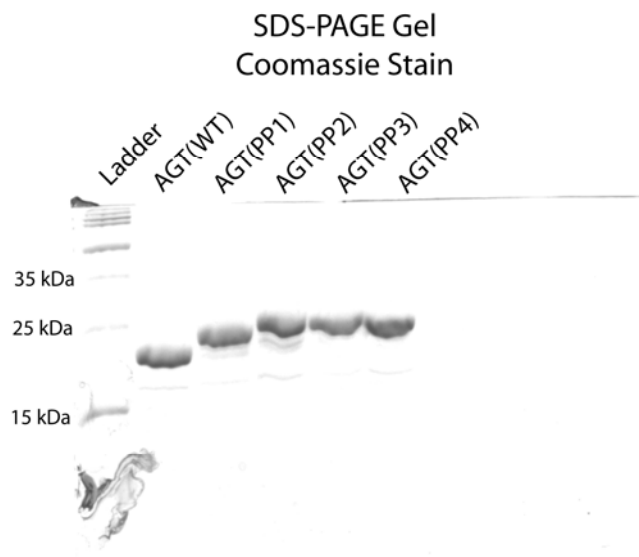

## V. Fluorescence Polarization Assay Data and Equation Binding Assays

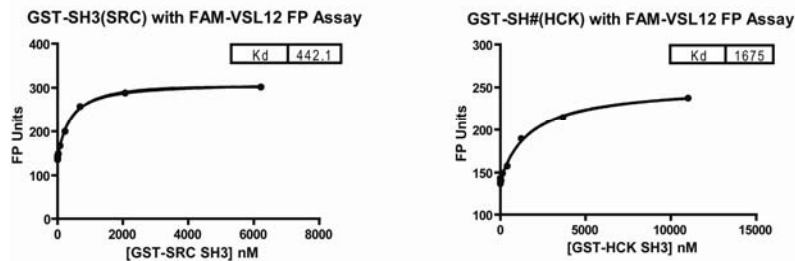

### Competition Assays

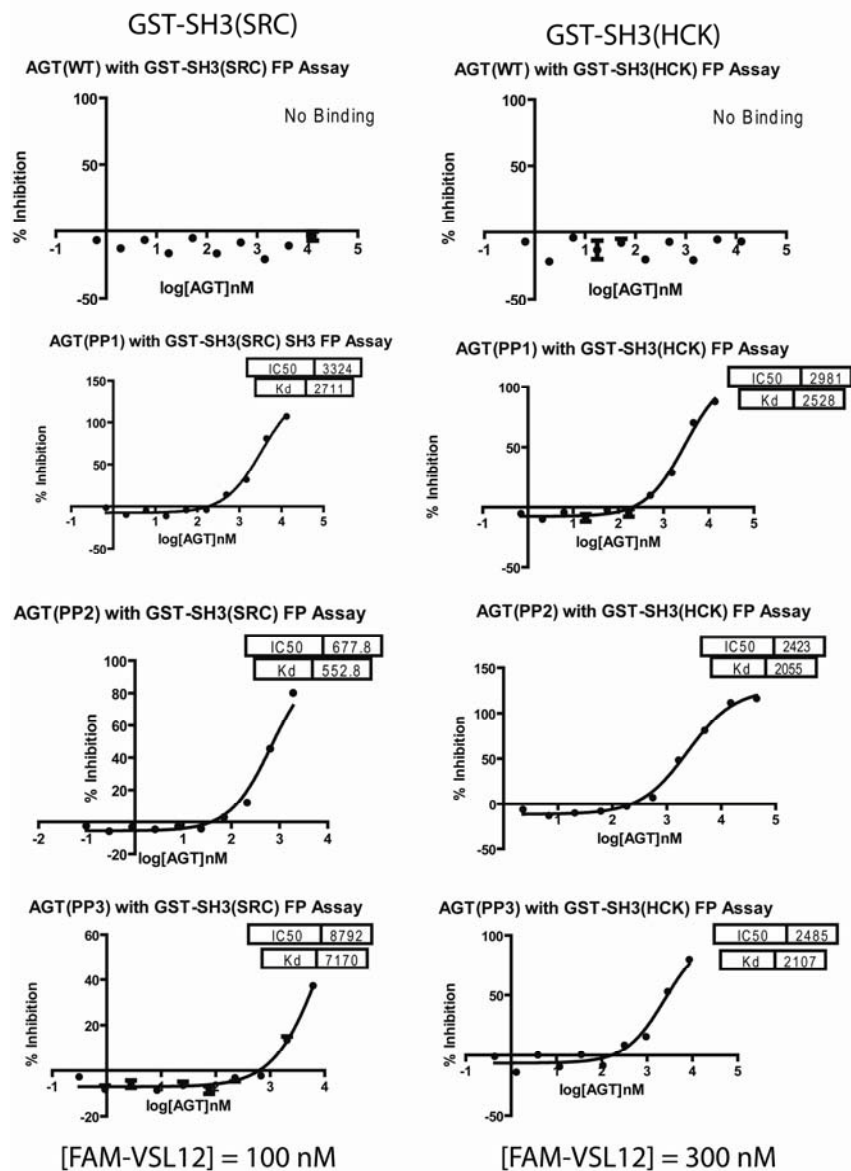

$$K_d(AGT\text{construct}) = \frac{IC_{50}}{1 + \frac{[FAM-VSL12]}{K_d(FAM-VSL12)}}$$

All FP assays contained two control wells. One with no GST-SH3 to give the minimum mP units, the other with no AGT construct to give maximal mP units. The minimum mP units were treated as background and subtracted from all assay data points. The mP units from the AGT titration wells were divided by the maximal signal to give the percent activity. This was subtracted from 100 to give percent inhibition which was plotted against log of AGT concentration to give the above plots.

Data was analyzed using Prism Graphpad software and implied  $K_d$  values were determined using non-linear regression analysis.  $K_d$  values were calculated from the observed  $IC_{50}$ s by dividing by 1 plus the concentration of FAM-VSL12 over the known  $K_d$  of FAM-VSL12 for the GST-SH3 domain. This relationship is described in the above equation.
